# Supplementary material for: Lithium intercalation behaviors in Ge and Sn crystalline surfaces
Source: Royal Society of Chemistry journal article supplement (doi:10.1039/c3cp51052b), 2013-01-01

*Supplementary Material for*

# **Lithium Intercalation Behaviors in Ge and Sn Crystalline Surfaces**

*Sung Chul Jung<sup>†</sup> and Young-Kyu Han<sup>‡,\*</sup>*

<sup>†</sup>Division of Materials Science, Korea Basic Science Institute Daejeon, 305-333, Republic of Korea

<sup>‡</sup>Department of Energy and Materials Engineering, Dongguk University-Seoul, Seoul 100-715,  
Republic of Korea

E-mail: ykenergy@dongguk.edu

**Table S1.** Binding energies ( $E_b$ ) of Li on the T4 and T4' sites of Ge(100) and diffusion barriers ( $E_d$ ) of Li for pathways connecting the two sites.  $N_{\text{layer}}$ ,  $d_{\text{vacuum}}$ , k-point mesh, and  $E_{\text{cut}}$  represent the number of Si layers in the slab, the vacuum spacing between the slabs, the subdivisions of the ( $4 \times 2$ ) surface Brillouin zone, and the plane-wave cut-off energy, respectively.  $\Delta E_b$  represents the difference between the T4 and T4' binding energies. The energy units are given in eV.

| $N_{\text{layer}}$ | $d_{\text{vacuum}}$ (Å) | k-point mesh          | $E_{\text{cut}}$ | $E_b$ |       | $\Delta E_b$ | $E_d$                |                      |
|--------------------|-------------------------|-----------------------|------------------|-------|-------|--------------|----------------------|----------------------|
|                    |                         |                       |                  | T4    | T4'   |              | T4 $\rightarrow$ T4' | T4' $\rightarrow$ T4 |
| 14                 | 11.5                    | $2 \times 4 \times 1$ | 173.8            | 2.201 | 2.255 | 0.054        | 0.252                | 0.307                |
| 18                 | 11.5                    | $2 \times 4 \times 1$ | 173.8            | 2.177 | 2.229 | 0.052        | 0.251                | 0.303                |
| 14                 | 14.4                    | $2 \times 4 \times 1$ | 173.8            | 2.179 | 2.233 | 0.054        | 0.250                | 0.304                |
| 14                 | 11.5                    | $3 \times 6 \times 1$ | 173.8            | 2.258 | 2.312 | 0.054        | 0.256                | 0.310                |
| 14                 | 11.5                    | $2 \times 4 \times 1$ | 217.3            | 2.186 | 2.240 | 0.054        | 0.251                | 0.306                |

**Table S2.** Binding energies ( $E_b$ ) of Li on the T4 and T4' sites of Sn(100) and diffusion barriers ( $E_d$ ) of Li for pathways connecting the two sites.

| $N_{\text{layer}}$ | $d_{\text{vacuum}} (\text{Å})$ | k-point mesh            | $E_{\text{cut}}$ | $E_b$ |       | $\Delta E_b$ | $E_d$                |                      |
|--------------------|--------------------------------|-------------------------|------------------|-------|-------|--------------|----------------------|----------------------|
|                    |                                |                         |                  | T4    | T4'   |              | T4 $\rightarrow$ T4' | T4' $\rightarrow$ T4 |
| 14                 | 13.3                           | 2 $\times$ 4 $\times$ 1 | 140.0            | 2.048 | 2.121 | 0.072        | 0.258                | 0.309                |
| 18                 | 13.3                           | 2 $\times$ 4 $\times$ 1 | 140.0            | 2.047 | 2.119 | 0.071        | 0.258                | 0.330                |
| 14                 | 16.6                           | 2 $\times$ 4 $\times$ 1 | 140.0            | 2.058 | 2.130 | 0.072        | 0.258                | 0.330                |
| 14                 | 13.3                           | 3 $\times$ 6 $\times$ 1 | 140.0            | 2.107 | 2.169 | 0.062        | 0.254                | 0.315                |
| 14                 | 13.3                           | 2 $\times$ 4 $\times$ 1 | 175.0            | 2.061 | 2.133 | 0.071        | 0.259                | 0.330                |

**Fig. S1.** Cross sections of bulk Si, Ge, and Sn along the  $\langle 100 \rangle$  and  $\langle 111 \rangle$  directions. Crosses and triangles represent the tetrahedral and hexagonal sites, respectively, and  $a$ ,  $b$ ,  $b'$ , and  $c$  represent the distances between the adjacent tetrahedral (or hexagonal) sites along each direction. In Si,  $a$ ,  $b$ ,  $b'$ , and  $c$  are 1.37, 0.79, 2.37, and 1.58 Å, respectively. In Ge,  $a$ ,  $b$ ,  $b'$ , and  $c$  are 1.44, 0.83, 2.50, and 1.67 Å, respectively. In Sn,  $a$ ,  $b$ ,  $b'$ , and  $c$  are 1.66, 0.96, 2.88, and 1.92 Å, respectively.

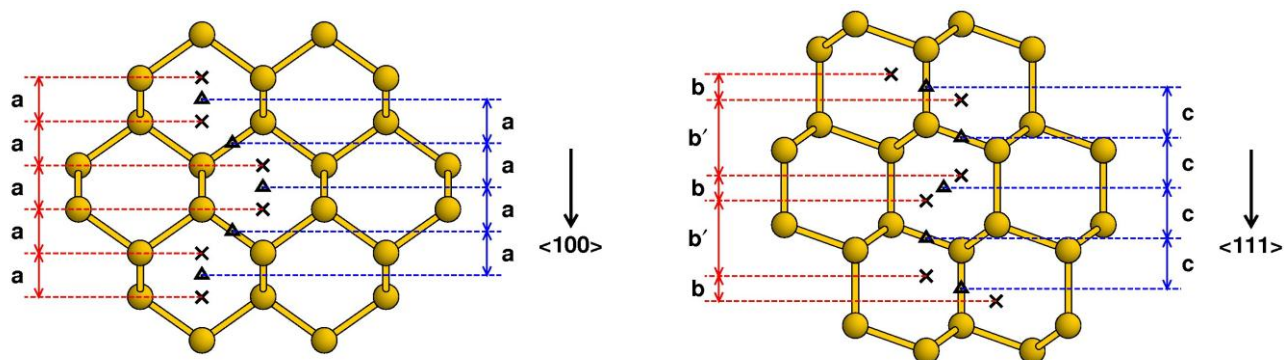

Supplement: c3cp51052b.pdf [file c3cp51052b.pdf]
